# Supplementary material for: Mechanism of methanol synthesis on Ni(110)
Source: Royal Society of Chemistry journal article supplement (doi:10.1039/d1cy00107h), 2021-01-01
Supplement: d1cy00107h1.pdf [file d1cy00107h1.pdf]

Supporting Information for

# Mechanism of Methanol Synthesis on Ni(110)

Guowen Peng<sup>1‡</sup>, Lang Xu<sup>1‡</sup>, Vassiliki-Alexandra Glezakou<sup>2</sup>, and Manos Mavrikakis<sup>1\*</sup>

<sup>1</sup>Department of Chemical and Biological Engineering, University of Wisconsin-Madison, Madison, Wisconsin 53706

<sup>2</sup>Chemical and Materials Sciences Division, Pacific Northwest National Laboratory, Richland, WA 99352

\*E-mail: [manos@engr.wisc.edu](mailto:manos@engr.wisc.edu)

‡These authors contributed equally.

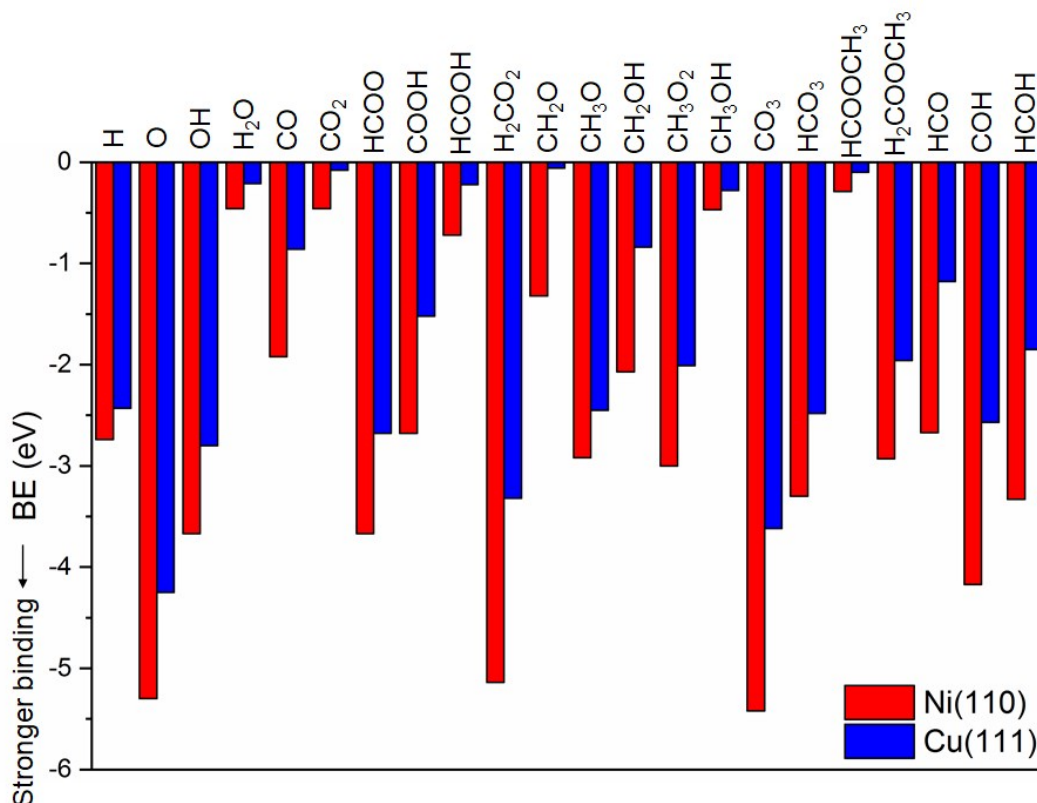

**Figure S1.** Comparison of calculated binding energies (BE) for adsorbed species on Ni(110) (red bars) and Cu(111) (blue bars). The Cu(111) values were taken from Ref. 1. Values on Cu(111) were

obtained using a different software package (DACAPO),<sup>1-3</sup> and therefore small discrepancies should be expected.

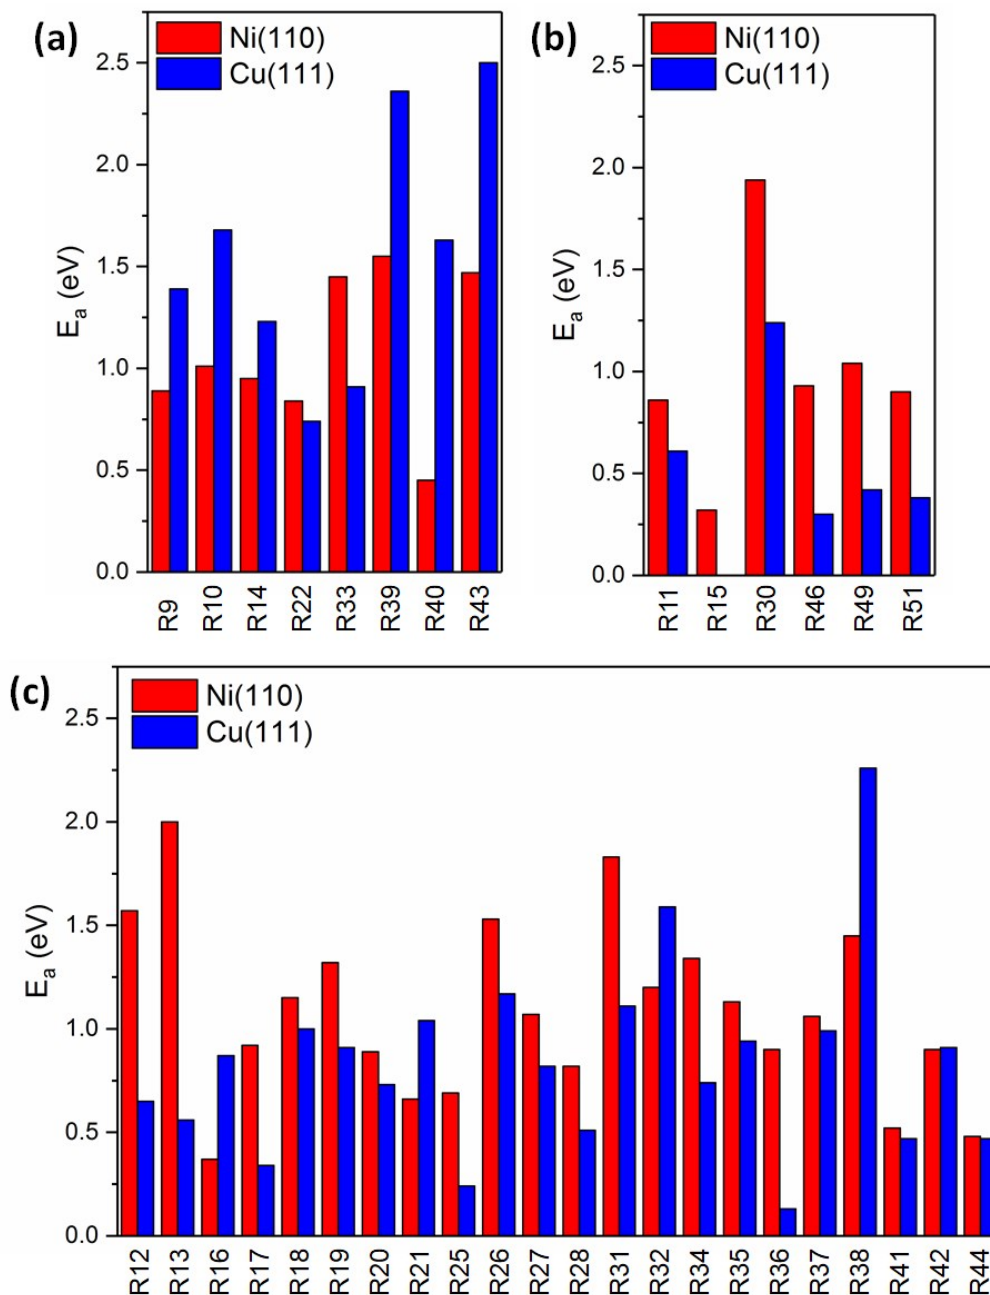

**Figure S2.** Comparison of calculated activation energy barriers ( $E_a$ ) for (a) bond-breaking, (b) disproportionation, and (c) bond-making elementary steps in the methanol synthesis reaction network on Ni(110) (red bars) and Cu(111) (blue bars). The reactions are numbered according to Table 2. The Cu(111) values were taken from Ref. 1. In (b), R15 ( $\text{COOH}^* + \text{OH}^* \rightarrow \text{CO}_2^* + \text{H}_2\text{O}^*$ ) is a spontaneous reaction ( $E_a = 0$ ) on Cu(111). Values on Cu(111) were obtained using a different software package (DACAPO),<sup>1-3</sup> and therefore small discrepancies should be expected.

**Table S1.** Calculated vibrational frequencies of gas-phase species and adsorbed species at their preferred adsorption sites on Ni(110). Notation on binding sites: PT for pseudo three-fold, SB for short bridge, and t for top.

| Species                             | Binding site   | Frequencies (1/cm)                                                                                                                                  |
|-------------------------------------|----------------|-----------------------------------------------------------------------------------------------------------------------------------------------------|
| H <sub>2</sub>                      | Gas phase      | 4315                                                                                                                                                |
| CO                                  | Gas phase      | 2127                                                                                                                                                |
| CO <sub>2</sub>                     | Gas phase      | 2367, 1322, 633, 632                                                                                                                                |
| H <sub>2</sub> O                    | Gas phase      | 3773, 3671, 1489                                                                                                                                    |
| CH <sub>2</sub> O                   | Gas phase      | 2861, 2809, 1762, 1484, 1224, 1148                                                                                                                  |
| HCOOH                               | Gas phase      | 3611, 2989, 1759, 1355, 1256, 1075, 1006, 678, 602                                                                                                  |
| CH <sub>3</sub> OH                  | Gas phase      | 3740, 3060, 2980, 1462, 1449, 1428, 1329, 1134, 1056, 1010, 286                                                                                     |
| HCOOCH <sub>3</sub>                 | Gas phase      | 3111, 3074, 3001, 2870, 1740, 1449, 1435, 1414, 1343, 1182, 1136, 1130, 989, 906, 748, 357, 296, 83                                                 |
| H*                                  | PT             | 1123, 945, 695                                                                                                                                      |
| O*                                  | PT             | 464, 409, 303                                                                                                                                       |
| OH*                                 | SB (tilted)    | 3660, 674, 599, 437, 290, 147                                                                                                                       |
| H <sub>2</sub> O*                   | Top            | 3689, 3545, 1543, 532, 461, 239, 152, 75, 53                                                                                                        |
| CO*                                 | SB             | 1853, 380, 347, 293, 157                                                                                                                            |
| CO <sub>2</sub> *                   | V-shape        | 1405, 1115, 704, 408, 317, 302, 204, 151, 112                                                                                                       |
| HCOO*                               | t-t (ridge)    | 2984, 1516, 1339, 1310, 978, 743, 343, 328, 325, 136, 115, 65                                                                                       |
| COOH*                               | SB (trans)     | 3610, 1475, 1200, 1114, 697, 596, 442, 338, 217, 167, 99, 44                                                                                        |
| HCOOH*                              | Top            | 3052, 2850, 1614, 1351, 1295, 1137, 953, 689, 650, 282, 249, 136, 107                                                                               |
| H <sub>2</sub> CO <sub>2</sub> *    | SB-SB (trench) | 2992, 2937, 1433, 1359, 1238, 1073, 999, 841, 533, 365, 351, 340, 335, 171, 149                                                                     |
| CH <sub>2</sub> O*                  | SB-SB (trench) | 2708, 2656, 1279, 1131, 1112, 851, 370, 363, 305, 304, 253, 224                                                                                     |
| CH <sub>3</sub> O*                  | SB             | 3017, 2971, 2836, 1431, 1423, 1401, 1128, 1110, 992, 365, 324, 198, 119, 84, 36                                                                     |
| CH <sub>2</sub> OH*                 | t-t (ridge)    | 3603, 3077, 2992, 1398, 1285, 1095, 1052, 822, 576, 523, 456, 314, 163, 152, 101                                                                    |
| CH <sub>3</sub> O <sub>2</sub> *    | SB-t (trench)  | 3441, 3003, 2946, 1439, 1354, 1295, 1195, 1049, 1002, 831, 553, 448, 317, 256, 252, 147, 139, 60                                                    |
| CH <sub>3</sub> OH*                 | top            | 3573, 3085, 3035, 2958, 1148, 1444, 1420, 1294, 1133, 1044, 971, 494, 269, 164, 143, 71, 48, 29                                                     |
| CO <sub>3</sub> *                   | t-t-SB         | 1356, 1198, 959, 737, 640, 625, 337, 315, 304, 181, 136, 131                                                                                        |
| HCO <sub>3</sub> *                  | t-SB           | 3669, 1517, 1366, 1188, 1010, 737, 632, 623, 566, 254, 225, 133, 116, 101, 56                                                                       |
| HCOOCH <sub>3</sub> *               | top            | 3109, 3037, 3019, 2964, 1677, 1432, 1428, 1408, 1354, 1199, 1142, 1115, 940, 883, 734, 345, 265, 197, 135, 107, 75, 51, 38, 30                      |
| H <sub>2</sub> COOCH <sub>3</sub> * | SB-SB (trench) | 3087, 3038, 2963, 2962, 2909, 1449, 1445, 1440, 1417, 1357, 1238, 1192, 1137, 1127, 1068, 964, 642, 465, 348, 319, 267, 228, 185, 137, 132, 118, 55 |
| HCO*                                | SB-SB          | 2832, 1165, 1032, 509, 402, 330, 287, 222, 186                                                                                                      |
| COH*                                | PT             | 3559, 1214, 1078, 485, 426, 364, 170, 148, 138                                                                                                      |
| HCOH*                               | SB             | 3312, 2974, 1343, 1159, 1104, 821, 476, 460, 334, 246, 140, 80                                                                                      |

## References

- (1) L. C. Grabow, M. Mavrikakis, *ACS Catal.* 2011, **1**, 365.
- (2) B. Hammer, L. B. Hansen, J. K. Nørskov, *Phys. Rev. B* 1999, **59**, 7413.
- (3) J. Greeley, J. K. Nørskov, M. Mavrikakis, *Annu. Rev. Phys. Chem.* 2002, **53**, 319.
